# Supplementary material for: Li3V2(PO4)3encapsulated flexible free-standing nanofabric cathodes for fast charging and long life-cycle lithium-ion batteries
Source: Royal Society of Chemistry journal article supplement (doi:10.1039/c5nr08832a), 2016-01-01
Supplement: c5nr08832a1.pdf [file c5nr08832a1.pdf]

## Supporting Information:

### **Li<sub>3</sub>V<sub>2</sub>(PO<sub>4</sub>)<sub>3</sub> Encapsulated Flexible Free-Standing Nanofabric Cathodes for Fast Charging and Long Life-Cycle Lithium-Ion Batteries**

*Pingping Sun<sup>a,b,1</sup>, Xueying Zhao<sup>a,1</sup>, Renpeng Chen<sup>a</sup>, Tao Chen<sup>a</sup>, Lianbo Ma<sup>a</sup>, Qi Fan<sup>b</sup>,  
Hongling Lu<sup>a</sup>, Yi Hu<sup>a</sup>, Zuoxiu Tie<sup>a</sup>, Zhong Jin<sup>a,\*</sup>, Qingyu Xu<sup>b,\*</sup>, Jie Liu<sup>a,c,\*</sup>*

<sup>a</sup> Key Laboratory of Mesoscopic Chemistry of MOE and Collaborative Innovation Center of Chemistry for Life Sciences, School of Chemistry and Chemical Engineering, Nanjing University, Nanjing, 210093, China

<sup>b</sup> Key Laboratory of MEMS of the Ministry of Education, Department of Physics, Southeast University, Nanjing 210096, China

<sup>c</sup> Department of Chemistry, Duke University, Durham, North Carolina 27708, USA

\*Corresponding authors.

Email addresses: [zhongjin@nju.edu.cn](mailto:zhongjin@nju.edu.cn) (Z. Jin), [xuqingyu@seu.edu.cn](mailto:xuqingyu@seu.edu.cn) (Q. Y. Xu), [j.liu@duke.edu](mailto:j.liu@duke.edu) (J. Liu).

<sup>1</sup>Both authors contributed equally to this work.

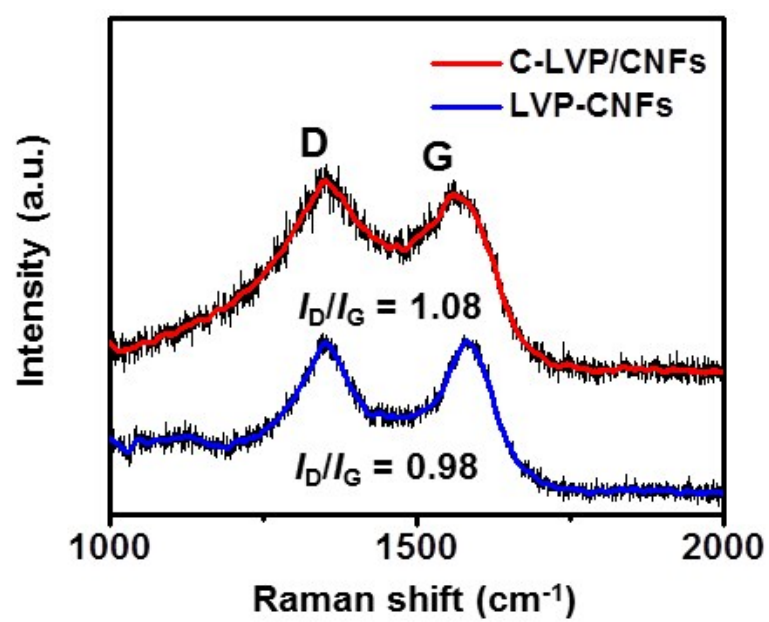

**Fig. S1.** Raman spectra of C-LVP/CNFs and LVP/CNFs.

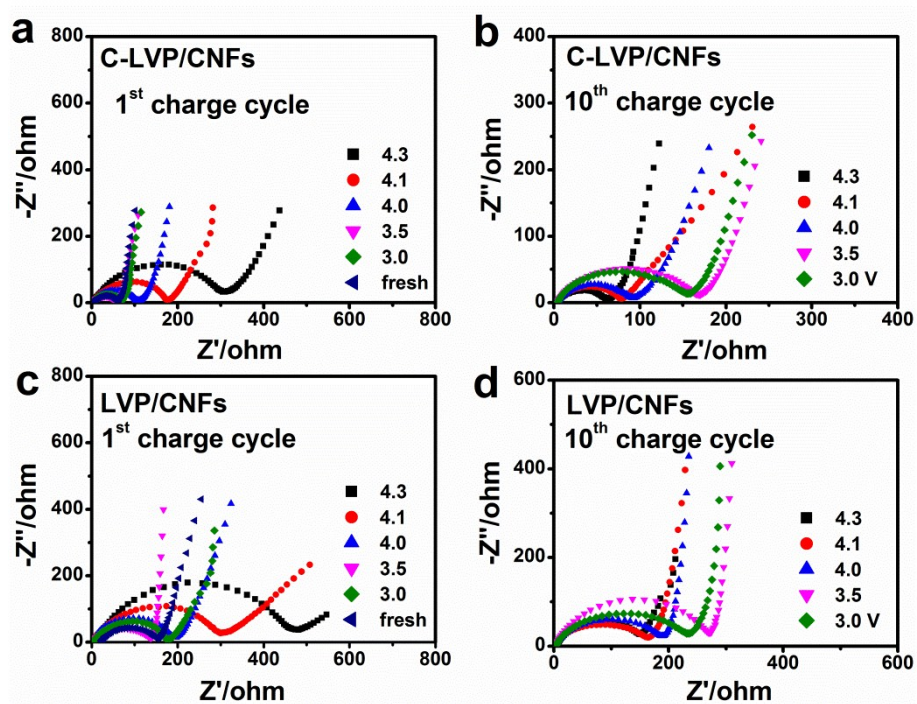

**Fig. S2.** Nyquist plots of (a,b) C-LVP/CNFs and (c,d) LVP/CNFs electrodes during 1<sup>st</sup> and 10<sup>th</sup> charge processes at various charge states (0.5 C).

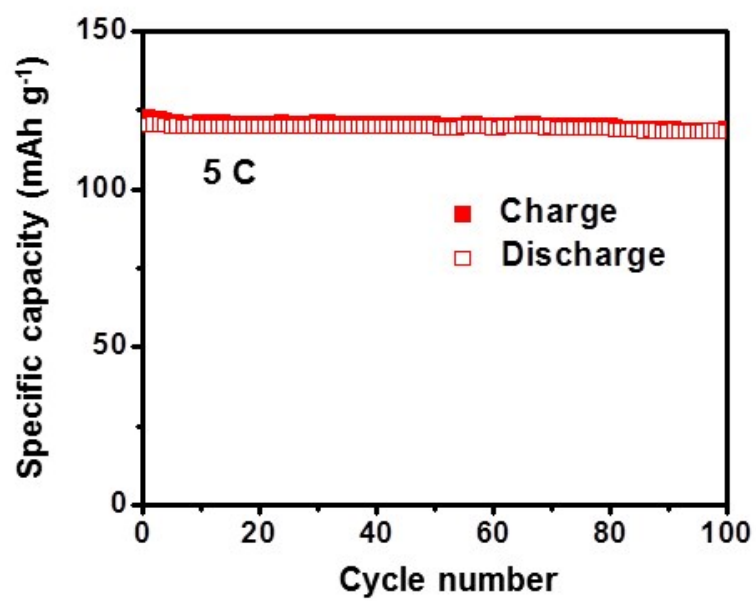

**Fig. S3.** Cycling performance of C-LVP/CNFs electrode at 5 C with the LVP active material of *ca.* 5.5 mg.
